# Supplementary material for: Characterization of Autochthonous Lactic Acid Bacteria Isolated from a Traditional Ethiopian Beverage, Tella
Source: MDPI journal article supplement (doi:10.3390/foods13040575), 2024-02-14
Supplement: s1 [file s1]

**Supplementary Table S1: Antibiotic sensitivity interpretative standard table**

1

| Class           | Antibiotic       | Disc concentration (µg) | Interpretative zone diameters (mm) <sup>1</sup> |       |     |
|-----------------|------------------|-------------------------|-------------------------------------------------|-------|-----|
|                 |                  |                         | R                                               | I     | S   |
| β-lactam        | Ampicillin       | 10                      | ≤13                                             | 13–15 | ≥15 |
| Amino glycoside | Gentamicin       | 10                      | ≤13                                             | 13–14 | ≥14 |
| Amino glycoside | Kanamycin        | 30                      | ≤14                                             | 14–17 | ≥17 |
| Amino glycoside | Streptomycin     | 10                      | ≤12                                             | 12–14 | ≥14 |
| Macrolides      | Erythromycin     | 15                      | ≤14                                             | 14–22 | ≥22 |
| Tetracyclines   | Tetracycline     | 30                      | ≤15                                             | 15–18 | ≥18 |
| Phenicol        | Chloramphenicol  | 30                      | ≤14                                             | 14–17 | ≥17 |
| β-lactam        | Penicillin G     | 10                      | ≤13                                             | 13–17 | ≥17 |
| sulfonamides    | Sulfamethoxazole | 110                     | ≤13                                             | 13–17 | ≥17 |
| Quinolones      | Ciprofloxacin    | 5                       | ≤13                                             | 13–17 | ≥17 |
| Macrolides      | Azithromycin     | 10                      | ≤13                                             | 13–18 | ≥18 |

<sup>1</sup>The interpretation standard referred to the CLSI criteria (Haghshenas et al., 2014; Won et al., 2020)  
S, Susceptible; I, Intermediate; R, Resistant

2

3

4
